# Supplementary material for: Dermatofibrosarcoma protuberans of the vulva: margins assessment and reconstructive options – a report of two cases
Source: PubMed Central journal article supplement (PMC6389240; doi:10.1186/1477-7819-12-399), 2014-12-29

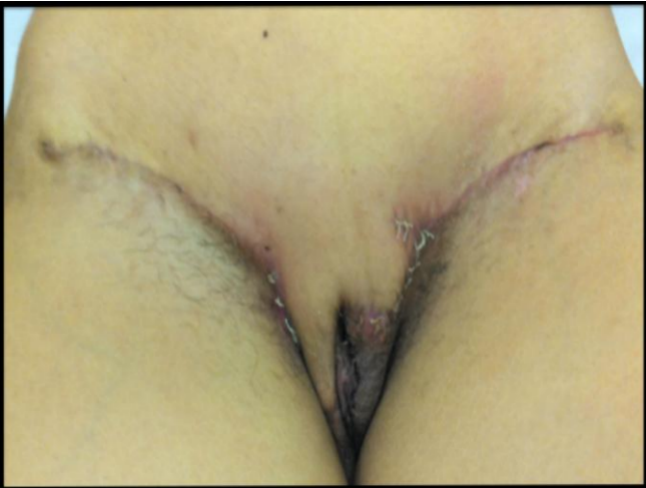

Supplement: 12957_2014_1919_MOESM2_ESM.pdf [file 12957_2014_1919_MOESM2_ESM.pdf]
